# Supplementary material for: Molecular map of cGAS-STING pathway-related genes in bladder cancer: the perspective toward immune microenvironment and prognosis
Source: publisher site journal article supplement (doi:10.18632/aging.205442), 2024-01-17
Supplement: Supplementary file [file aging-v16i2-205442-supplementary-material-SD1.pdf]

**SUPPLEMENTARY FIGURE**

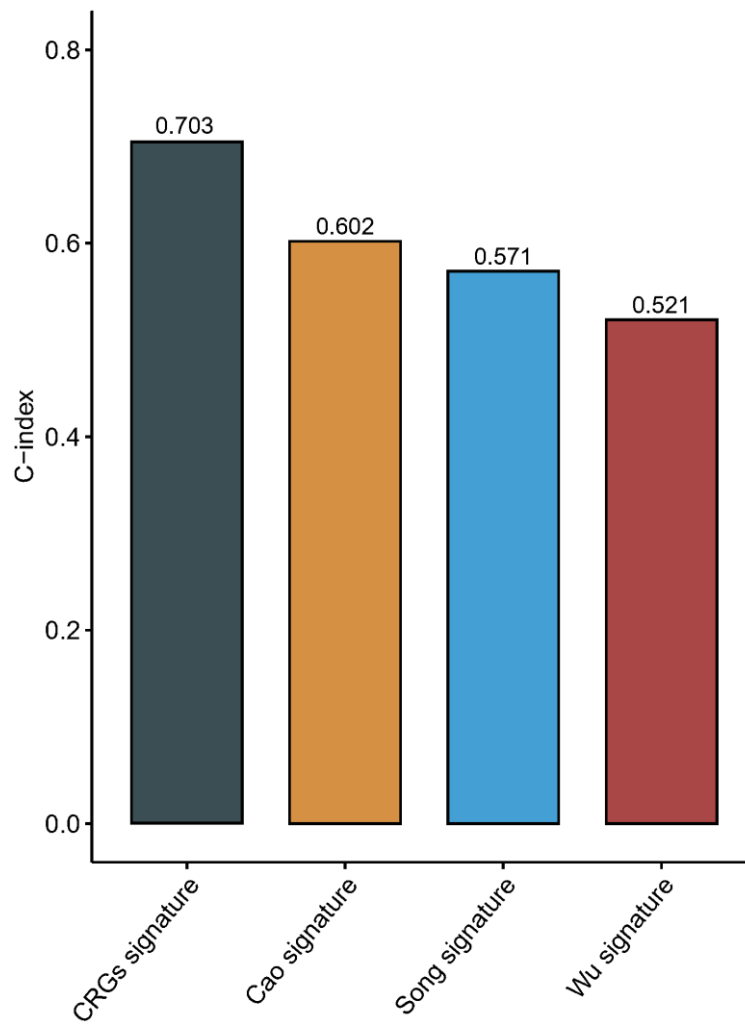

**Supplementary Figure 1. Comparison of C-index of different prognostic signatures.**
